# Supplementary material for: Green Synthesis of Copper Oxide Nanoparticles from the Leaves of Aegle marmelos and Their Antimicrobial Activity and Photocatalytic Activities
Source: MDPI journal article supplement (doi:10.3390/molecules28227499), 2023-11-09
Supplement: s1 [file s1]

# Green Synthesis of Copper Oxide Nanoparticles from the Leaves of *Aegle marmelos* and Their Antimicrobial Activity and Photocatalytic Activities

Syed Ghazanfar Ali <sup>1</sup>, Uzma Haseen <sup>2</sup>, Mohammad Jalal <sup>1</sup>, Rais Ahmad Khan <sup>3</sup>, Ali Alsalmeh <sup>3</sup>, Hilal Ahmad <sup>4,\*</sup> and Haris Manzoor Khan <sup>1</sup>

<sup>1</sup> Department of Microbiology, Jawaharlal Nehru Medical College, Aligarh Muslim University, Aligarh 202002, India

<sup>2</sup> Department of Chemistry, Aligarh Muslim University, Aligarh 202002, India

<sup>3</sup> Department of Chemistry, College of Science, King Saud University, Riyadh 11451, Saudi Arabia

<sup>4</sup> SRM Institute of Science and Technology, Kattankulathur, Chennai 603203, India

\* Correspondence: hilalahmad418@gmail.com

Supplementary Table S1: Representing the zone of inhibition in mm at different concentration of CuO NPs against different microorganism

|                        | <b>Zone of inhibition (mm) at different concentration of CuO NPs</b> |           |           |           |            |
|------------------------|----------------------------------------------------------------------|-----------|-----------|-----------|------------|
| <b>Microorganisms</b>  | 62.5 µg/ml                                                           | 125 µg/ml | 250 µg/ml | 500 µg/ml | 1000 µg/ml |
| <i>E.coli</i>          | ND                                                                   | 10        | 14        | 18        | 22         |
| <i>S. aureus</i>       | ND                                                                   | 10        | 13        | 16        | 21         |
| <i>C. albicans</i>     | ND                                                                   | ND        | 12        | 15        | 20         |
| <i>C. dubliniensis</i> | ND                                                                   | ND        | 12        | 14        | 19         |

ND= Not detected
